# Supplementary material for: Cyclin E2 is the predominant E-cyclin associated with NPAT in breast cancer cells
Source: PubMed Central journal article supplement (PMC4349318; doi:10.1186/s13008-015-0007-9), 2015-02-19
Supplement: 13008_2015_7_MOESM1_ESM.pdf [file 13008_2015_7_MOESM1_ESM.pdf]

## Additional File 1: Cyclin E1 and cyclin E2 localise to distinct nuclear foci in MCF-7 cells

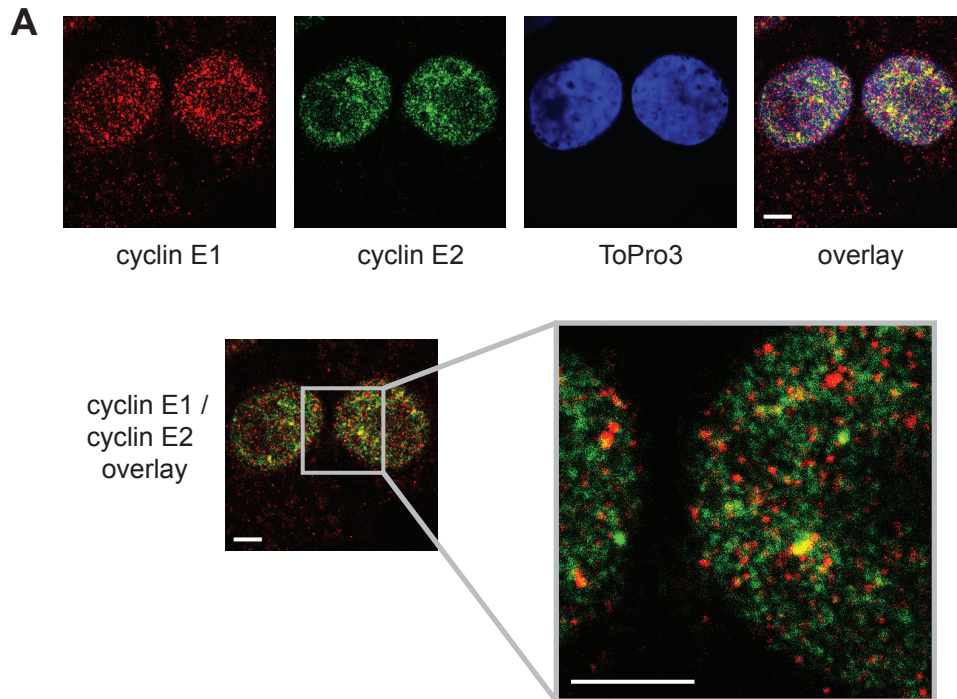

### Additional File 1 – Cyclins E1 and E2 localise to distinct nuclear foci in MCF-7 cells

A. Confocal images of MCF-7 breast cancer cells immunoprobed with cyclin E1 (red) or cyclin E2 (green), and counterstained with ToPro3 (blue, nuclei). Inset at higher magnification. Scale bars = 5  $\mu\text{m}$ . Experiments are performed in triplicate.
