# Supplementary material for: Cyclin E2 is the predominant E-cyclin associated with NPAT in breast cancer cells
Source: PubMed Central journal article supplement (PMC4349318; doi:10.1186/s13008-015-0007-9), 2015-02-19
Supplement: 13008_2015_7_MOESM4_ESM.pdf [file 13008_2015_7_MOESM4_ESM.pdf]

### Additional File 4: Specific immunostaining for cyclin E2 in the presence of cyclin E1 siRNA

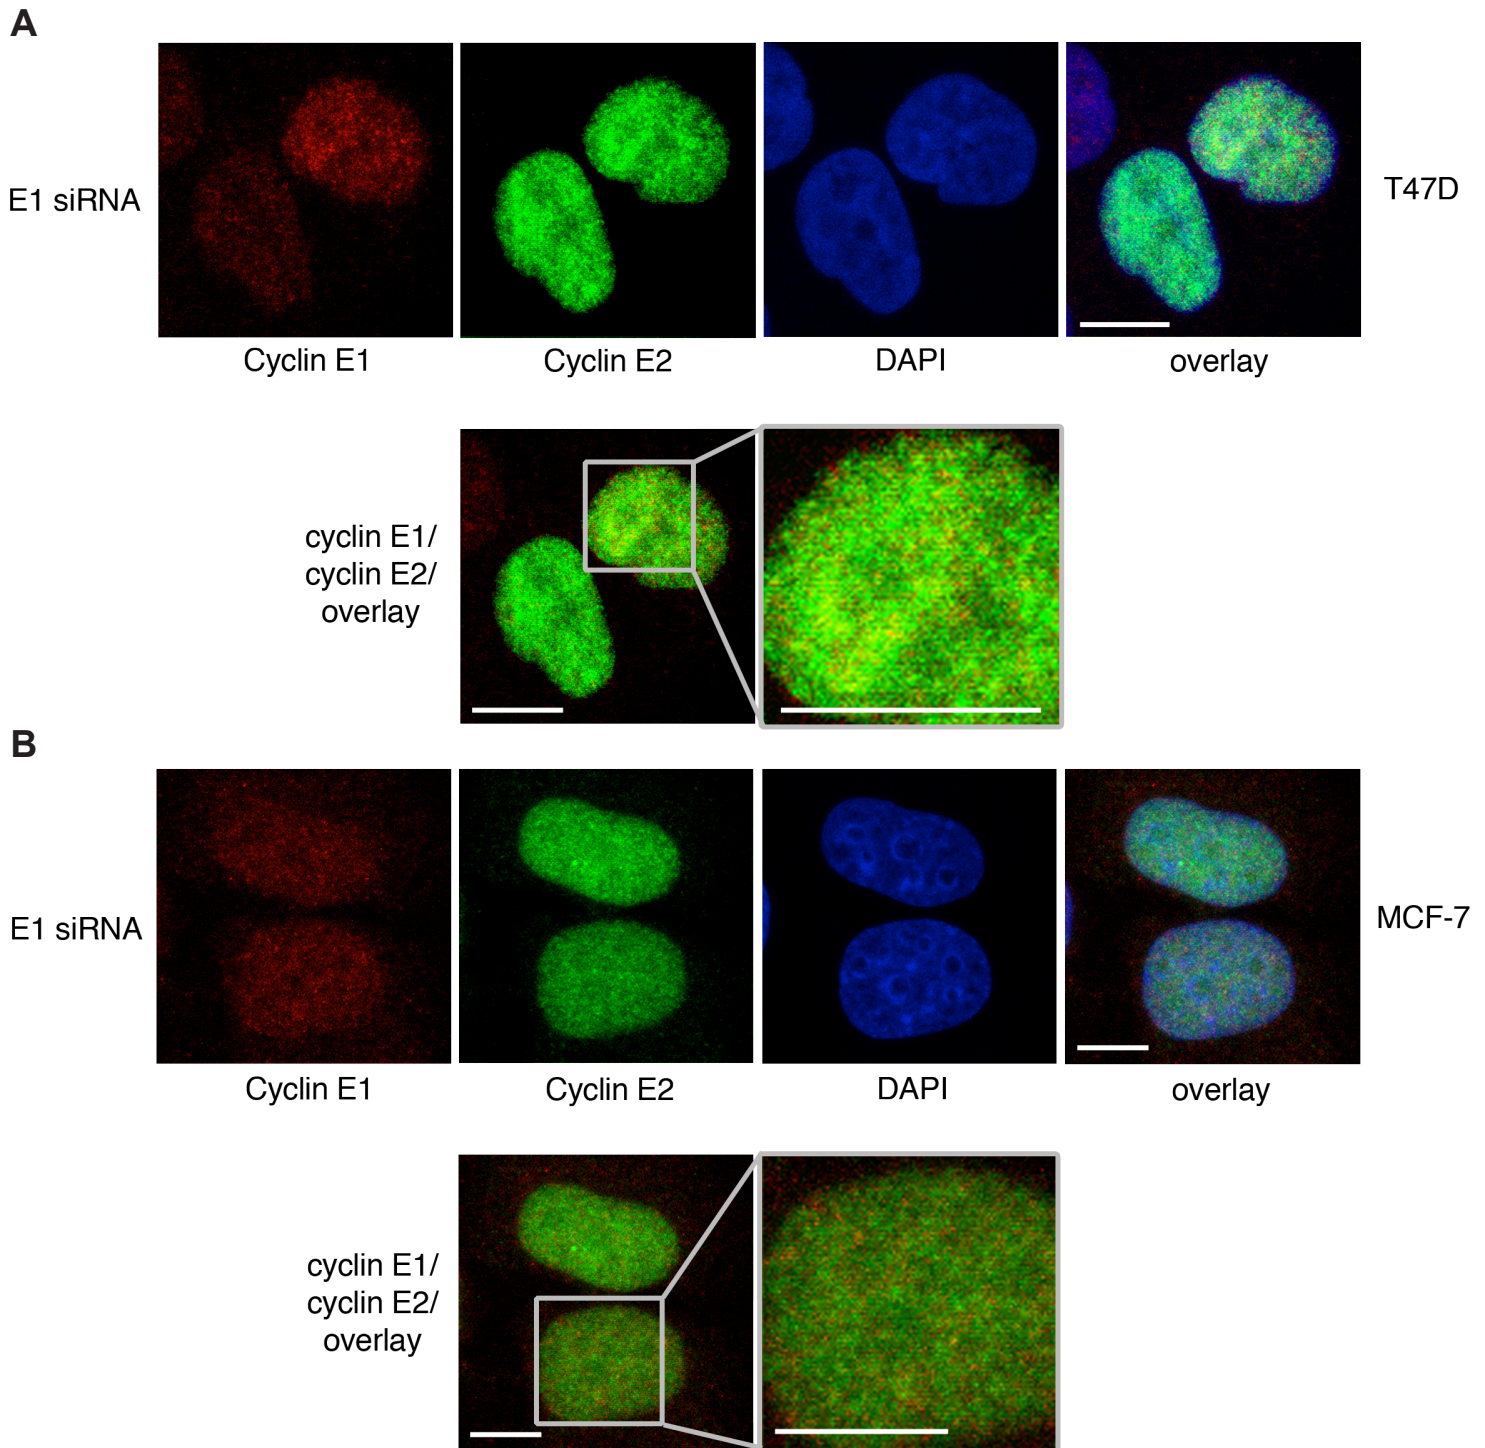

#### Additional File 4 – Specific immunostaining for cyclin E2 in the presence of cyclin E1 siRNA

Breast cancer cells were transfected with 20nm cyclin E1 siRNA for 48h as described in [19]. Confocal images of MCF-7 cells (A.) and T-47D cells (B.) immunoprobed with cyclin E1 (red), cyclin E2 (green) and DAPI (blue). Inset at higher magnification. Experiments performed in duplicate. Scale bars = 10 $\mu$ m.
