# Supplementary material for: Cyclin E2 is the predominant E-cyclin associated with NPAT in breast cancer cells
Source: PubMed Central journal article supplement (PMC4349318; doi:10.1186/s13008-015-0007-9), 2015-02-19
Supplement: 13008_2015_7_MOESM5_ESM.pdf [file 13008_2015_7_MOESM5_ESM.pdf]

**Additional File 5: Representative subsets of replication-dependent and -independent histones**

| <b>Histone Class</b>                    | <b>Name</b> | <b>Chromosome</b> |
|-----------------------------------------|-------------|-------------------|
| <b>Replication-dependent histones</b>   | HIST1H2AG   | 6p22.1            |
|                                         | HIST1H2AH   | 6p22.1            |
|                                         | HIST1H2BB   | 6p22.1            |
|                                         | HIST1H2BF   | 6p22.1            |
|                                         | HIST1H4J    | 6p22.1            |
|                                         | HIST1H4L    | 6p22.1            |
| <b>Replication-independent histones</b> | H1F0        | 22q13.1           |
|                                         | H1FX        | 3q21.3            |
|                                         | H2AFJ       | 12p12.3           |
|                                         | H2AFX       | 11q23.3           |
|                                         | H3F3A       | 1q42.12           |
|                                         | H3F3B       | 17q25.1           |
